## Title

**Prevalence of SARS-CoV-2 antibodies in Denmark 2020: results from nationwide, population-based sero-epidemiological surveys**

## Authors

Laura (LE) Espenhain<sup>1</sup>, Siri (ST) Tribler<sup>1</sup>, Charlotte (CSJ) Sværke Jørgensen<sup>2</sup>, Christian (CHH) Holm Hansen<sup>1</sup>, Ute (UWS) Wolff Sönksen<sup>3</sup>, Steen (SE) Ethelberg<sup>1,4</sup>

## Affiliations

<sup>1</sup> Department of Infectious Disease Epidemiology and Prevention, Statens Serum Institut, Artillerivej 5, 2300 Copenhagen S, Denmark

<sup>2</sup> Department of Virus & Microbiological Special Diagnostics, Statens Serum Institut, Artillerivej 5, 2300 Copenhagen S, Denmark

<sup>3</sup> Department of Bacteria, Parasites and Fungi, Statens Serum Institut, Artillerivej 5, 2300 Copenhagen S, Denmark

<sup>4</sup> Department of Public Health, Global Health Section, University of Copenhagen, Øster Farimagsgade 5, 1014 Copenhagen K, Denmark.

**Running title:** COVID-19 seroprevalence in Denmark

**40 words summary:** We describe population-based COVID-19 seroprevalence surveys performed in Denmark in 2020. The seroprevalence increased during the year, particularly in adolescents and young adults, but was overall low. Roughly two undiagnosed cases per PCR-confirmed case were detected by December 2020.

## Corresponding author

Laura Espenhain, Department of Infectious Disease Epidemiology and Prevention, Statens Serum Institut, 5 Artillerivej, 2300 Copenhagen S, Denmark, T: +45 3268 5374, e-mail: laes@ssi.dk.

**NOTE:** This preprint reports new research that has not been certified by peer review and should not be used to guide clinical practice.

**Background.** Seroprevalence studies have proven an important tool to monitor the progression of the coronavirus disease 2019 (COVID-19) epidemic. We present results of consecutive population-based seroprevalence surveys performed in Denmark in 2020.

**Methods.** Invitation letters including a questionnaire covering symptoms were sent to representatively drawn samples of the population in spring, late summer and autumn/winter of 2020. Blood samples from participants taken at public test-centers were analyzed for total Ig and seroprevalence estimates per population segment calculated and compared to other surveillance parameters.

**Results.** From 34,081 participating individuals (response rate 33%), we obtained seroprevalence estimates increasing from 1.1% (95%CI: 0.7%–1.7) in May to 4.0 % (95%CI: 3.4%–4.7%) in December 2020. By December 2020, 1.5% of the population 12 years and older had tested positive by PCR. Seroprevalence estimates were roughly 3 times higher in those aged 12-29 compared to 65+ and higher in metropolitan municipalities. Among seropositives, loss of taste/smell were the more specific symptoms, 32%-56% did not report any symptoms. In half of seroconverted families, we did not see evidence of transmission between generations. Infected individuals in older age groups were hospitalized several fold more often than in younger.

**Conclusions.** Seroprevalence increased during 2020; younger age groups were primarily infected in the autumn/winter surge. Approximately half were asymptotically infected. Denmark has a high per capita test rate; roughly two undiagnosed infections of COVID-19 were estimated to occur for each diagnosed case. The epidemic appears to have progressed relatively modestly during 2020 in Denmark.

## **Keywords**

Seroepidemiological studies, population register, questionnaire, COVID-19 serological testing

Word count: Abstract: 246 words; text: 2952 words.

1 **BACKGROUND**

2           The degree to which the COVID-19 pandemic is spreading through different countries or regions may  
3 be assessed through population-based seroprevalence studies, which aim to quantify the proportion of the  
4 population that has developed antibodies against SARS-CoV-2. Such studies have to date been performed  
5 in a number of countries [1-9].

6           Similar to several other European countries, Denmark experienced increased transmission of SARS-  
7 CoV-2 infection in spring and late autumn 2020. A comprehensive lock-down was imposed in March 2020,  
8 gradually lifted towards summer and again gradually reintroduced during autumn and winter [10]. The  
9 Danish National Seroprevalence Survey of SARS-CoV-2 infection (DSS) was initiated in the spring of 2020,  
10 following a parliamentary decision in April 2020, which called for a representative population study to be  
11 performed. The study design was set by recommendation from a group of independently appointed  
12 national experts in April 2020 [11] and seroprevalence subsequently determined at several time points  
13 throughout 2020. Here we describe the set-up and results from DSS and relate the results to the national  
14 surveillance of PCR diagnosed COVID-19-cases.

15

## 16 **METHODS**

### 17 **Design and study population**

18 DSS is a nationwide population-based prevalence survey aiming to investigate seroprevalence for  
19 SARS-CoV-2. The study was launched in the spring of 2020 and performed by Statens Serum Institut (SSI)  
20 over three rounds: In May 2020 (DSS-I), August 2020 (DSS-II) and September-December 2020 (DSS-III).

21 For each survey round, a random population sample of Danish residents was drawn from the Danish  
22 civil registry [12]. For DSS-I, adults aged 18 years and older living in one of 30 municipalities which had a  
23 test facility (see below) at that time (n=5), or were neighboring a municipality with a test facility (n=25)  
24 were eligible (approximately 45% of the population of Denmark). For DSS-II and DSS-III, people aged 12  
25 years or older were selected by random sampling, with no restriction on municipality (n=98). Parents living  
26 on the same address as invited children 12-17 years old, were also invited to participate.

27

### 28 **Recruitment**

29 We primarily invited participants using the Danish digitalized postal system covering 90% of the  
30 Danish population [13]. Invitation letters (as pdf's) were sent via the secure, digital mailbox-system ("e-  
31 Boks"), using the civil registration number. Additionally, physical letters were sent by regular mail to  
32 invitees below 18 years of age and to those without e-Boks. For DSS-I we invited 2,600 people on May 5  
33 and 15. For DSS-II we invited 6,000 people on August 15, 21 and 28. For DSS-III we invited 70,000 people  
34 over a 14 week period from September 11 to December 11, 2020. Letters of invitation contained  
35 information about: the aim and study design, details about the antibody test (how to interpret and  
36 understand the test result), and how to book a test. DSS-II and DSS-III also included a link to an electronic  
37 questionnaire. Invitations and questionnaires were available in Danish, English and Arabic language  
38 versions. The questionnaire contained, among others, questions about current and past symptoms.

39

#### 40 **TestCenter Denmark, sample collection and analysis**

41 Blood sampling was performed at test stations of ‘TestCenter Denmark’, a public national SARS-CoV-  
42 2 test facility system established during March and April 2020 [14, 15]. At nation-wide facilities it offers free  
43 of charge easy access PCR testing for asymptomatic or mildly symptomatic individuals, in addition to the  
44 existing laboratories at the acute care hospitals that test symptomatic individuals and hospitalized patients  
45 upon admission. Timeslots for PCR testing were booked by the individual through a secure website. By May  
46 2020, 22 PCR-test facilities had been established, of which five facilities were additionally equipped for  
47 taking blood samples. DSS-I made use of these five test stations. By August 2020, antibody testing could be  
48 carried out in 17 of the 22 PCR-test facilities. These were used for DSS-II and DSS-III. Study participants  
49 could book timeslots for antibody testing using the same IT-platform as for PCR testing. Transportation to a  
50 test facility was at participants’ own cost. Blood sampling was performed by medically trained personnel.  
51 Five ml blood samples were taken in BD Vacutainer® Serum tubes. The sample was packed, collected and  
52 transported to SSI for analysis. Total serum concentration of anti-SARS-CoV-2 immunoglobulin was  
53 measured by use of the Wantai SARS-CoV-2 Ab ELISA (Beijing Wantai Biological Pharmacy Enterprise,  
54 Beijing, China) according to the manufacturer’s instructions.

55

#### 56 **Data source and the Danish COVID-19 surveillance data**

57 The Danish Microbiological Database (MiBa) contains all microbiological test results from all clinical  
58 microbiological departments in Denmark and microbiological and serological results from TestCenter  
59 Denmark [16]. Using MiBa we identified antibody test results and previous COVID-19-PCR-test results  
60 amongst the study participants. We used information on number of admitted and deceased by date, sex  
61 and age group from the Danish surveillance system of COVID-19 [17, 18]. This involves daily registry linkage  
62 to the National Patient Registry [19] for information about hospital admissions and to the Civil Registry and  
63 The National Cause of Death Register [20] for information about deaths within 30 days for PCR-diagnosed  
64 COVID-19 cases.

## 65 **Statistical analyses**

66 We included all persons with a conclusive antibody test result within ten weeks from the invitation.  
67 We estimated the seroprevalence as the proportion of participating individuals with a positive antibody  
68 test result. We adjusted the seroprevalence estimates for test sensitivity (0.97) and specificity (0.995)  
69 (internal assessment at SSI) using the Rogan-Gladen estimator [21] and computed 95% confidence intervals  
70 using Blaker's method [22]. We present seroprevalence by age group, sex, the five geographical regions of  
71 Denmark and classification of municipality (capital, metropolitan, provincial, commuter, rural) as defined by  
72 Statistics Denmark [23]. To evaluate whether the variation in response rate by age groups, sex and region  
73 affected the estimated seroprevalence, we predicted the value (0 = negative and 1 = positive) of the  
74 missing serology test by multiple imputation including sex, age group and region in the prediction model.

75 For the analyses, we defined four periods (May, August, October and December) as the time periods  
76 the seroprevalence estimate reflected. We compared the estimates of infected individuals to the number  
77 of PCR test positive, hospitalized and deceased in national surveillance. To do that, we subtracted 14 days  
78 from the mean date of blood sampling in the four periods to compare with PCR-test positive from the  
79 national surveillance system, and added 10 days to find the comparable date for hospital admission and 20  
80 days for number of deaths.

81

## 82 **Ethical and legal considerations**

83 The DSS was performed as a national disease surveillance project, registered with the Danish Data  
84 Protection Agency and approved regarding legal, ethical and cyber-security issues by the SSI Compliance  
85 department in conjunction with the Danish governmental law firm. Participation in the survey was  
86 voluntary and invitees received information about the selection procedure, risks associated with  
87 participation, data security issues, their legal rights, including the right to withdraw from the study, and the  
88 use of their data and results in the letter of invitation.

89

## 90 RESULTS

### 91 Participation

92 The COVID-19 incidence and test intensity in Denmark in 2020 is depicted in Figure 1. The three DSS  
93 study rounds had 2,512 (48%), 7,015 (39%), and 18,161 (26%) participants, respectively (Table 1). The  
94 median dates of sampling for the four defined study periods were May 18 (defined as ‘May’), September 19  
95 (‘August’), November 6 (‘October’), and December 16 (‘December’) (Figure 1).

96 Overall participation was lower in males and younger age groups (Table 1). For DSS-II and DSS-III  
97 respectively, the questionnaire was filled in by 2,737 (39%) and 10,358 (57%) of the participants.

98

### 99 Seroprevalence

100 The proportion of participants with detectable SARS-CoV-2 antibodies increased from 1.1% (95%CI:  
101 0.7%–1.7%) in May 2020 to 4.0 % (95%CI: 3.4%–4.7%) in December 2020 (Table 2). Restricting the analysis  
102 to match the narrower geographic and age inclusion criteria for DSS-I, the estimated seroprevalence in  
103 December was 5.1% (95%CI 4.0%–6.2%). When taking the non-response by age group, sex and region of  
104 residence into account by imputation, the estimates increased with up to 0.4 percentage points (Table 2).  
105 Point estimates tended to be higher in the two younger age groups (12 to 17 years and 18 to 39 years of  
106 age), lower in the 65 years and older age group (Figure 2), and higher in the Capital region than in the other  
107 four regions. No difference was observed by sex (Table 2).

108

### 109 Seroprevalence of children and their parents

110 A total of 1,244 families had a child and at least one parent tested. Among these, 79 (6.4%) families  
111 were found to have at least one seropositive family member. These included 3.2% with a seropositive child  
112 and 4.2% families with at least one seropositive parent. In 21 of the 79 seropositive families (27%), both  
113 child and parent(s) were seropositive, in 19 families (24%) only the child was seropositive and in 39 (49%)  
114 seropositive families the child was seronegative.

115

### 116 **Symptoms among seropositive participants**

117           Of the 369 seropositive participants who filled in the questionnaire, 59% reported having  
118 experienced at least one of five core symptoms (fever, cough, shortness of breath and/or loss of sense of  
119 taste or smell) since February 2020, versus 28% among seronegative participants (Table 3). Loss of smell or  
120 taste, reported by 24% and 23% of the seropositives, respectively, were highly associated with  
121 seropositivity (odds ratios of 16 and 14, respectively, Table 3).

122           In DSS-II 44% (95%CI: 32%-56%) of the seropositive participants reported no symptoms since  
123 February and a further 9% reported symptoms not belonging to the five mentioned core symptoms. In DSS-  
124 III the equivalent figures were 27% and 11%.

125

### 126 **Previous PCR positive participants**

127           Of the altogether 104,413 invited persons (93,200 randomly selected Danish residents and 11,213  
128 parents to selected children), 871 had a positive PCR-test result prior to the antibody test or prior to the  
129 invitation to the study. Of these, 271 (31%) had an antibody test taken 12 days or more after the positive  
130 PCR result. SARS-CoV-2 antibodies were detected in 251 of the previous PCR positive persons (95% when  
131 adjusting for the sensitivity and specificity of the test) and 20 did not have detectable antibodies. The  
132 median time in days between the positive PCR result and the positive antibody test result was 56 days  
133 range [12–293] and 59.5 days range [13–213] for the 20 seronegative persons.

134

### 135 **Seroprevalence in relation to PCR-diagnosed, admitted and deceased COVID-19 cases**

136           According to the national COVID-19 surveillance system, 78,125 persons above 12 years (153/10,000  
137 inhabitants) had tested positive for SARS-CoV-2 by PCR in Denmark by December 2 (Figure 1). Our finding of  
138 a seroprevalence of 4.0% (95%CI 3.4–4.7) corresponds to a total of 205,000 (172,000–239,000) persons  
139 above 12 years of age having been infected in Denmark as by December 2020. Thus the estimated ratio of



140 infected to PCR-diagnosed cases was three in December and six in May 2020 (Table 4). The estimated ratio  
141 varied by age. It was higher in the 18-39 year age group in May and August and decreased during autumn.  
142 No obvious pattern was seen for the 65-year and older age group, by region or sex during the period (Table  
143 4). The infection fatality rate and rate of admitted out of the estimated number of infected increased  
144 markedly with older age (Table 4).  
145

146 **DISCUSSION**

147 In this national representative seroprevalence study among Danish residents aged 12 years and  
148 older, we found detectable SARS-CoV-2 antibodies in 4.0 % (95%CI: 3.4–4.7%) of the participants by the  
149 beginning of December 2020. This was four times more than the estimate from May and twice the estimate  
150 of August 2020. This study also provides information on the regional and demographic progression of the  
151 epidemic and its results can be interpreted in the context of other surveillance parameters.

152 The seroprevalence varied by geography and age group, which is consistent with the general picture  
153 from the national surveillance system. It appears that people from more densely populated urban areas  
154 were infected in the early stage of the epidemic, and that the epidemic only gradually spread to the less  
155 densely populated areas later. Our results are in line with the serological surveys of blood donors which has  
156 also been carried out in Denmark [24], although this group may not be representative of the general  
157 population.

158 Between May and December 2020, PCR testing rose from 150 to more than 1000 tests per 10,000  
159 inhabitants per week. Our results show that the proportion of PCR-confirmed COVID-19 cases out of all  
160 estimated infections was 1:5 in the spring but just 1:2 by early December. There were relatively more  
161 undiagnosed cases in the 18-39-year age group during the first six month of the epidemic, suggesting that  
162 this age group may experience a less severe course of disease. It is well established that severity of illness  
163 increases markedly with age [25] and the estimated infection fatality and infection admission rate also  
164 increased markedly by age group in this study.

165 National representative seroprevalence surveys from other countries have shown quite variable  
166 seroprevalence estimates [26]: Surveys in France [27] in May, and Spain [2] and Brazil [9] in June and the  
167 Netherlands [7] in July 2020 estimated that respectively around 4.5%, 5%, 3.5% and 4% of the population  
168 had been infected with SARS-CoV-2 at that point. All four surveys revealed substantial geographical  
169 variability. In September a survey carried out in the US found that in 25 of 49 jurisdictions with sufficient  
170 samples to estimate seroprevalence more than 5% of people had detectable SARS-CoV-2 antibodies [1].

171 Our results are comparatively low and thus the epidemic appears to have affected Denmark only mildly in  
172 2020. This may be corroborated by the cumulated mortality numbers, which by 31 Dec 2020 were 23 per  
173 100,000 [17], placing Denmark in the lower end of the European scale [28].

174 Estimates from other studies of the share of asymptomatic infections out of the total number of  
175 SARS-CoV-2 infections vary notably from a few percent to 41% with a pooled overall proportion of 17%  
176 found in a recent meta-analysis [29-31]. In DSS-II carried out in the late summer, 44% of the seropositive  
177 participants did not recall having had any symptoms of acute infection since February 2020 and an  
178 additional 9% reported symptoms not typically associated with COVID-19. The percentage reporting no  
179 symptoms since February 2020 fell to 27% in the DSS-III. However at this point other respiratory illnesses  
180 may increasingly have affected the results. Thus, our best estimate is that around half of the seropositive  
181 persons had an asymptomatic infection. We found that loss of smell or taste, experienced by almost  $\frac{1}{4}$  with  
182 SARS-CoV-2 antibodies, were by far the more specific symptoms of COVID-19 infection.

183 In more than two thirds of families with at least one seropositive family member, only the parent(s)  
184 or the child had seroconverted, indicating that transmission between generations within households is the  
185 exception rather than the rule. We were unable to disentangle the chain of transmission between  
186 generations.

187 Though actual numbers were low, we found that <5% of previous PCR positive participants did not  
188 have detectable SARS-CoV-2-antibodies 12 days after their first positive PCR test. This might be because of  
189 waning immunity, or that the individuals did not elicit a detectable antibody response (possibly due to mild  
190 or asymptomatic infection). The proportion does correspond to what has been reported from Iceland [32]  
191 and a study in preprint from the UK [6].

192 Denmark has a relatively high degree of IT penetration and frequently makes use of national registers  
193 and public digital resources. Utilization hereof was among the strengths of this study. From the Danish  
194 national civil register, it was possible to obtain a random sample of residents, and identify the parents of  
195 those below 18 years of age. Individually referable national surveillance data allowed us to identify all

196 previous PCR tests amongst the participants and relate this to their antibody-status. Another strength of  
197 the study was the use of the logistical set-up of the large state-driven test-system, TestCenter Denmark,  
198 that was created as a parallel system to the existing clinical test system located at the hospitals. Using the  
199 existing set up for PCR testing, meant that most people had an easy access to a test facility for antibody  
200 testing. However, due to the geographical distribution of the test stations, some persons had quite long  
201 driving distances to a test facility (up to 100 km), which may have affected their willingness to participate in  
202 the study.

203 The study had several limitations. When interpreting the findings, the suboptimal participation rates  
204 should be taken into account. Participation decreased from 48% in DSS-I, through 39% in DSS-II to 26% in  
205 DSS-III, and even fewer replied to the questionnaire concerning symptoms. Even though the drawn sample  
206 is representative of the population, participation may not be. We do not know if certain subgroups of the  
207 population were underrepresented in the study, but may presume that hard to reach populations would be  
208 so. The seroprevalence estimates were stable but slightly underestimated when taking the non-response by  
209 age group, sex and region of residence into account.

210 In conclusion, our study provides estimates of SARS-CoV-2 dissemination in Denmark at four time  
211 points, based on a representative sample of the population and relate it to the number of PCR-confirmed  
212 COVID-19 cases in the national surveillance system. We found that the epidemic had predominantly  
213 affected the capital and metropolitan areas and saw indications of a higher seroprevalence in young adults  
214 throughout the epidemic, although children 12-17 years old were mainly affected in the second surge of  
215 the epidemic. Overall, the estimated seroprevalence in Denmark throughout 2020 was low, compared to  
216 other countries. The results seem to support that the measures introduced in Denmark in the spring of  
217 2020 and onwards have been effective in keeping the epidemic from developing rapidly in the community,  
218 however also indicate that the majority of the population is still at risk of contracting COVID-19. As more  
219 than one in three infections seem to be asymptomatic, social distance measures and efforts to identify and  
220 isolate new cases and their contacts are imperative for future epidemic control.

## Notes

**Author contributions.** Study conception and design: LE, ST and SE. Acquisition of data: all authors. Analysis and interpretation of data: all authors. LE, ST and SE drafted the first version of the article, all authors took part in revising it critically for important intellectual content and approved of the final version to be published. LE and CHH had full access to all of the data and take responsibility for the accuracy of the data analysis.

**Disclaimer.** The funder asked for a ‘population representative study design’. The funder had no role in data collection and analysis, writing of or decision to submit the manuscript for publication.

**Funding:** This study was supported by an ad hoc grant from the Danish Government (§16.11.73 on the National budget 2021).

**Acknowledgements.** We thank everyone who participated in this study by giving blood. We thank all staff in TestCenter Denmark, including staff in test stations, the involved SSI departments and the expert group that advised on the design of the study.

**Potential conflicts of interest:** All authors (LE, ST, CSJ, CHH, UWS and SE) report no conflict of interest.

## REFERENCES

1. Bajema KL, Wiegand RE, Cuffe K, et al. Estimated SARS-CoV-2 Seroprevalence in the US as of September 2020. *JAMA Intern Med* **2020**.
2. Pollan M, Perez-Gomez B, Pastor-Barriuso R, et al. Prevalence of SARS-CoV-2 in Spain (ENE-COVID): a nationwide, population-based seroepidemiological study. *Lancet* **2020**; 396(10250): 535-44.
3. Stringhini S, Wisniak A, Piumatti G, et al. Seroprevalence of anti-SARS-CoV-2 IgG antibodies in Geneva, Switzerland (SEROCoV-POP): a population-based study. *Lancet* **2020**; 396(10247): 313-9.
4. Tunheim G.; Kran AR, G.; Steens, A.; Hungnes O.; Lund-Johansen, F.; Tran, T.; Andersen JT.; Vaage J. Seroprevalence of SARS-CoV-2 in the Norwegian population measured in residual sera – analyses collected in April/May 2020 and August 2019. Oslo: Norwegian Institute of Public Health, **2020**.
5. Merkely B, Szabo AJ, Kosztin A, et al. Novel coronavirus epidemic in the Hungarian population, a cross-sectional nationwide survey to support the exit policy in Hungary. *Geroscience* **2020**; 42(4): 1063-74.
6. Ward H, Atchison C, Whitaker M, et al. Antibody prevalence for SARS-CoV-2 following the peak of the pandemic in England: REACT2 study in 100,000 adults. **2020**.
7. Vos ERA, den Hartog G, Schepp RM, et al. Nationwide seroprevalence of SARS-CoV-2 and identification of risk factors in the general population of the Netherlands during the first epidemic wave. *J Epidemiol Community Health* **2020**.
8. Royo-Cebrecos C, Vilanova D, López J, et al. Mass SARS-CoV-2 serological screening for the Principality of Andorra. **2020**.
9. Hallal PC, Hartwig FP, Horta BL, et al. SARS-CoV-2 antibody prevalence in Brazil: results from two successive nationwide serological household surveys. *Lancet Glob Health* **2020**; 8(11): e1390-e8.
10. Lyngse FP, Kirkeby CT, Halasa T, et al. COVID-19 Transmission Within Danish Households: A Nationwide Study from Lockdown to Reopening. In: Department of Economics & Center for Economic Behaviour and Inequality UoCDMoHSSIDoVaAS, Faculty of Health and Medical, Sciences UoCDoS, Roskilde University. <https://www.medrxiv.org/content/10.1101/2020.09.09.20191239v1.full.pdf>, **2020**.
11. Office DPM. 20. april udvides første fase af genåbningen. Available at: <https://www.regeringen.dk/nyheder/2020/aftale-vedroerende-udvidelse-af-den-foerste-fase-af-en-kontrolleret-genaabning/>. Accessed 10-02-2021.
12. Schmidt M, Pedersen L, Sorensen HT. The Danish Civil Registration System as a tool in epidemiology. *Eur J Epidemiol* **2014**; 29(8): 541-9.
13. Ebert JF, Huibers L, Christensen B, Christensen MB. Paper- or Web-Based Questionnaire Invitations as a Method for Data Collection: Cross-Sectional Comparative Study of Differences in Response Rate, Completeness of Data, and Financial Cost. *J Med Internet Res* **2018**; 20(1): e24.
14. Bager P, Wohlfahrt J, Fonager J, et al. Increased Risk of Hospitalisation Associated with Infection with SARS-CoV-2 Lineage B.1.1.7 in Denmark. **2021**.
15. Hansen CH, Michlmayr D, Gubbels SM, Molbak K, Ethelberg S. Assessment of protection against reinfection with SARS-CoV-2 among 4 million PCR-tested individuals in Denmark in 2020: a population-level observational study. *Lancet* **2021**; 397(10280): 1204-12.
16. Voldstedlund M, Haarh M, Molbak K, MiBa Board of R. The Danish Microbiology Database (MiBa) 2010 to 2013. *Euro Surveill* **2014**; 19(1).
17. Institut SS. Overvågningdata for covid-19 i Danmark og Europa. Available at: <https://covid19.ssi.dk/overvagningsdata>. Accessed 10-02-2021.
18. Institut SS. Statens Serum Institut - covid-19 - Danmark (Kommunalt). Available at: [www.ssi.dk/covid19data](http://www.ssi.dk/covid19data). Accessed 10-02-2021.
19. Schmidt M, Schmidt SA, Sandegaard JL, Ehrenstein V, Pedersen L, Sorensen HT. The Danish National Patient Registry: a review of content, data quality, and research potential. *Clin Epidemiol* **2015**; 7: 449-90.

20. Helweg-Larsen K. The Danish Register of Causes of Death. *Scand J Public Health* **2011**; 39(7 Suppl): 26-9.
21. Rogan WJ, Gladen B. Estimating prevalence from the results of a screening test. *Am J Epidemiol* **1978**; 107(1): 71-6.
22. Reiczigel J, Foldi J, Ozsvari L. Exact confidence limits for prevalence of a disease with an imperfect diagnostic test. *Epidemiol Infect* **2010**; 138(11): 1674-8.
23. Denmark S. Municipality Groups v1:2018-. Available at: <https://www.dst.dk/da/Statistik/dokumentation/nomenklaturer/kommunegrupper#>.
24. Blodbank. Coronavirus, Bloddonorere bliver nu igen undersøgt for overstået infektion med coronavirus. Available at: [https://bloddonor.dk/coronavirus/?utm\\_source=MarketingPlatform&utm\\_medium=email&utm\\_campaign=Nyhedsbrev+-+oktober+2020&utm\\_content=72197205](https://bloddonor.dk/coronavirus/?utm_source=MarketingPlatform&utm_medium=email&utm_campaign=Nyhedsbrev+-+oktober+2020&utm_content=72197205). Accessed 17.12.2020.
25. Reilev M, Kristensen KB, Pottgard A, et al. Characteristics and predictors of hospitalization and death in the first 11 122 cases with a positive RT-PCR test for SARS-CoV-2 in Denmark: a nationwide cohort. *Int J Epidemiol* **2020**; 49(5): 1468-81.
26. Arora RK, Joseph A, Van Wyk J, et al. SeroTracker: a global SARS-CoV-2 seroprevalence dashboard. *Lancet Infect Dis* **2020**.
27. Warszawski J, Bajos N, Meyer L, et al. In May 2020, 4.5% of the population of metropolitan France had developed antibodies against SARS-CoV-2 The first results of the EpiCov national survey, **2020**.
28. Control) EECfDPa. COVID-19 country overview. **2021**.
29. Sakurai A, Sasaki T, Kato S, et al. Natural History of Asymptomatic SARS-CoV-2 Infection. *N Engl J Med* **2020**; 383(9): 885-6.
30. Kim GU, Kim MJ, Ra SH, et al. Clinical characteristics of asymptomatic and symptomatic patients with mild COVID-19. *Clin Microbiol Infect* **2020**; 26(7): 948 e1- e3.
31. Byambasuren O, Cardona M, Bell K, Clark J, McLaws M-L, Glasziou P. Estimating the extent of asymptomatic COVID-19 and its potential for community transmission: Systematic review and meta-analysis. *Official Journal of the Association of Medical Microbiology and Infectious Disease Canada* **2020**.
32. Gudbjartsson DF, Norddahl GL, Melsted P, et al. Humoral Immune Response to SARS-CoV-2 in Iceland. *N Engl J Med* **2020**; 383(18): 1724-34.

**Table 1. Number of invited persons and proportion who participated by DSS, age group, sex, and region**

| Group            | DSS-I*  |               | DSS-II  |              | DSS-III |              |
|------------------|---------|---------------|---------|--------------|---------|--------------|
|                  | Invited | Participation | Invited | Participated | Invited | Participated |
| Total            | 5,200   | (48)          | 18,000  | (39)         | 70,000  | (26)         |
| <b>Age group</b> |         |               |         |              |         |              |
| 12-17 years      |         |               | 1,492   | (31)         | 5,631   | (20)         |
| 18-39 years      | 2,146   | (40)          | 5,715   | (32)         | 22,105  | (22)         |
| 40-64 years      | 2,077   | (56)          | 6,700   | (48)         | 26,173  | (33)         |
| 65+ years        | 977     | (50)          | 4,093   | (36)         | 16,091  | (22)         |
| <b>Sex</b>       |         |               |         |              |         |              |
| Female           | 2,585   | (53)          | 9,132   | (44)         | 35,282  | (29)         |
| Male             | 2,615   | (44)          | 8,868   | (34)         | 34,718  | (23)         |
| <b>Region</b>    |         |               |         |              |         |              |
| Capital          | 2,167   | (48)          | 5,680   | (42)         | 22,268  | (30)         |
| Zealand          | 619     | (43)          | 2,618   | (39)         | 10,107  | (26)         |
| Southern Denmark | 798     | (46)          | 3,737   | (35)         | 14,646  | (20)         |
| Mid Jutland      | 1,035   | (52)          | 4,108   | (38)         | 15,865  | (23)         |
| North Jutland    | 581     | (52)          | 1,857   | (40)         | 7,113   | (29)         |

\*Includes only people 18 years and older living in one of 30 municipalities which had a test facility at the time (n=5) or

was neighboring a municipality with a test facility (n=25). Approximately 45% of the population of Denmark



**Table 2. Seroprevalence of SARS-CoV-2 in May, August – December 2020, by age group, sex, region and type of municipality**

|                                    | May* (n=2,512) |             | August (n=11,478) |             | October (n=9,654) |             | December (n=4,044) |             |
|------------------------------------|----------------|-------------|-------------------|-------------|-------------------|-------------|--------------------|-------------|
|                                    | %              | (95% CI)    | %                 | (95% CI)    | %                 | (95% CI)    | %                  | (95% CI)    |
| Total                              | 1.1            | (0.7 - 1.7) | 2.0               | (1.7 - 2.3) | 2.2               | (1.9 - 2.6) | 4.0                | (3.4 - 4.7) |
| Adjusted total                     | 1.5            | (0.9 - 2.1) | 2.0               | (1.7 - 2.4) | 2.4               | (1.9 - 2.8) | 4.3                | (3.4 - 5.1) |
| <b>Age group</b>                   |                |             |                   |             |                   |             |                    |             |
| 12-17 years                        |                |             | 0.9               | (0.2 - 2.2) | 2.8               | (1.6 - 4.5) | 6.4                | (3.8 - 10)  |
| 18-39 years                        | 2.3            | (1.1 - 3.6) | 2.8               | (2.2 - 3.6) | 3.3               | (2.6 - 4.1) | 5.2                | (4.0 - 6.6) |
| 40-64 years                        | 0.6            | (0.0 - 1.1) | 2.0               | (1.5 - 2.4) | 2.0               | (1.5 - 2.5) | 3.5                | (2.7 - 4.6) |
| 65+ years                          | 0.5            | (0.0 - 1.1) | 1.5               | (0.9 - 2.1) | 1.1               | (0.6 - 1.8) | 2.3                | (1.2 - 3.8) |
| <b>Sex</b>                         |                |             |                   |             |                   |             |                    |             |
| Female                             | 0.8            | (0.3 - 1.6) | 2.1               | (1.7 - 2.5) | 2.0               | (1.6 - 2.4) | 4.1                | (3.3 - 5.1) |
| Male                               | 1.5            | (0.7 - 2.5) | 2.0               | (1.5 - 2.4) | 2.6               | (2.0 - 3.1) | 3.9                | (3.0 - 5.1) |
| <b>Region</b>                      |                |             |                   |             |                   |             |                    |             |
| Capital                            | 1.8            | (1.0 - 2.9) | 3.2               | (2.6 - 3.8) | 3.2               | (2.6 - 3.9) | 5.0                | (3.9 - 6.2) |
| Zealand                            | 1.8            | (0.5 - 4.4) | 1.8               | (1.1 - 2.7) | 1.3               | (0.7 - 2.1) | 3.9                | (2.4 - 6.0) |
| South                              | 0.6            | (0 - 2.3)   | 1.5               | (0.9 - 2.2) | 1.6               | (0.9 - 2.4) | 3.2                | (2.0 - 4.9) |
| Mid Jutland                        | 0.2            | (0 - 1.4)   | 1.2               | (0.7 - 1.8) | 2.0               | (1.3 - 2.7) | 3.5                | (2.1 - 5.1) |
| North Jutland                      | 0.5            | (0 - 2.4)   | 1.1               | (0.5 - 2.0) | 1.6               | (0.8 - 2.5) | 3.0                | (1.4 - 5.3) |
| <b>Type of area (municipality)</b> |                |             |                   |             |                   |             |                    |             |
| Capital                            | 1.8            | (1.0 - 2.9) | 3.2               | (2.6 - 4.0) | 3.5               | (2.8 - 4.2) | 5.6                | (4.4 - 7.0) |
| Metropolitan                       | 0.8            | (0.2 - 1.9) | 1.8               | (1.1 - 2.6) | 1.5               | (0.7 - 2.3) | 4.9                | (3.2 - 7.0) |
| Provincial                         | 3.1            | (0.9 - 7.6) | 1.5               | (0.9 - 2.1) | 2.2               | (1.6 - 3.0) | 3.5                | (2.3 - 5.0) |
| Commuter                           | 0              | (0 - 1.1)   | 1.9               | (1.2 - 2.7) | 0.7               | (0.2 - 1.5) | 3.3                | (1.9 - 5.1) |
| Rural                              | 0              | (0 - 2.7)   | 0.9               | (0.5 - 1.6) | 1.7               | (1.0 - 2.5) | 1.2                | (0.4 - 2.7) |

\*Includes only people 18 years and older living in one of 30 municipalities which had a test facility at the time (n=5) or was neighboring a municipality with a test facility (n=25). Approximately 45% of the population of Denmark.

**Table 3 Number, proportion (%) of participants and odds ratio of symptoms, by antibody status, DSS-II and DSS-III, Denmark 2020**

| Symptom*                        | Positive (n=369) |                | Negative (n=12,726) |                | Odds ratio | 95%CI       |
|---------------------------------|------------------|----------------|---------------------|----------------|------------|-------------|
|                                 | Number           | Proportion (%) | Number              | Proportion (%) |            |             |
| No symptoms reported            | 112              | (30)           | 7,232               | (57)           | 0.33       | (0.27-0.42) |
| At least one relevant symptom** | 216              | (59)           | 3,508               | (28)           | 3.7        | (3.0-4.6)   |
| Fever                           | 139              | (38)           | 1,801               | (14)           | 3.7        | (3.0-4.6)   |
| Cough                           | 141              | (38)           | 2,544               | (20)           | 2.5        | (2.0-3.1)   |
| Shortness of breath             | 71               | (20)           | 811                 | (6)            | 3.6        | (2.7-4.7)   |
| Loss of sense of smell          | 88               | (23)           | 241                 | (2)            | 16         | (12-21)     |
| Loss of sense of taste          | 84               | (22)           | 263                 | (2)            | 14         | (11-19)     |
| Other symptoms***               | 41               | (11)           | 1,986               | (16)           | 0.68       | (0.47-0.94) |

\* In the period since 1 February 2020

\*\*Relevant symptoms includes one or more of the following: fever, cough, shortness of breath and/or loss of sense of taste or smell

\*\*\* Muscle ache, eye pain, head ache, colored sputum, runny nose, sneezing, back pain, tiredness without one of the five relevant symptoms

**Table 4. Ratio between estimated number of infected and PCR-diagnosed cases from national surveillance at four time points, number of COVID-19 admissions, infection admission rate, number of COVID-19 deaths and infection fatality rate by December 2020, by age group and sex, Denmark 2020**

|             | Estimated ratio of infected/PCR-diagnosed COVID-19 cases |        |         |          | Estimated number of infected by December 2 | Admissions per December 12** | IAR (%) | Death per December 22** | IFR (%) |
|-------------|----------------------------------------------------------|--------|---------|----------|--------------------------------------------|------------------------------|---------|-------------------------|---------|
|             | May*                                                     | August | October | December |                                            |                              |         |                         |         |
| Total       | 6                                                        | 6      | 3       | 3        | 205,000                                    | 5,987                        | 3.0     | 1,081                   | 0.53    |
| Age group   |                                                          |        |         |          |                                            |                              |         |                         |         |
| 12-17 years | -                                                        | 5      | 4       | 3        | 26,000                                     | 58                           | 0.22    | 0                       | -       |
| 18-39 years | 13                                                       | 7      | 4       | 2        | 83,000                                     | 642                          | 0.77    | 3                       | 0.00    |
| 40-64 years | 2                                                        | 5      | 3       | 2        | 67,000                                     | 2,033                        | 3.0     | 56                      | 0.08    |
| 65+ years   | 3                                                        | 5      | 3       | 3        | 27,000                                     | 3,164                        | 12      | 1,022                   | 3.8     |
| Sex         |                                                          |        |         |          |                                            |                              |         |                         |         |
| Female      | 4                                                        | 6      | 3       | 3        | 105,000                                    | 2,790                        | 2.6     | 480                     | 0.46    |
| Male        | 9                                                        | 6      | 4       | 3        | 100,000                                    | 3,107                        | 3.1     | 601                     | 0.60    |

\*Includes only people 18 years and older living in one of 30 municipalities which had a test facility at the time (n=5) or was neighboring a municipality with a test facility (n=25). Approximately 45% of the population of Denmark

\*\*Among confirmed COVID-19 cases from national surveillance

IAR=Infection admission rate. IFR=Infection fatality rate

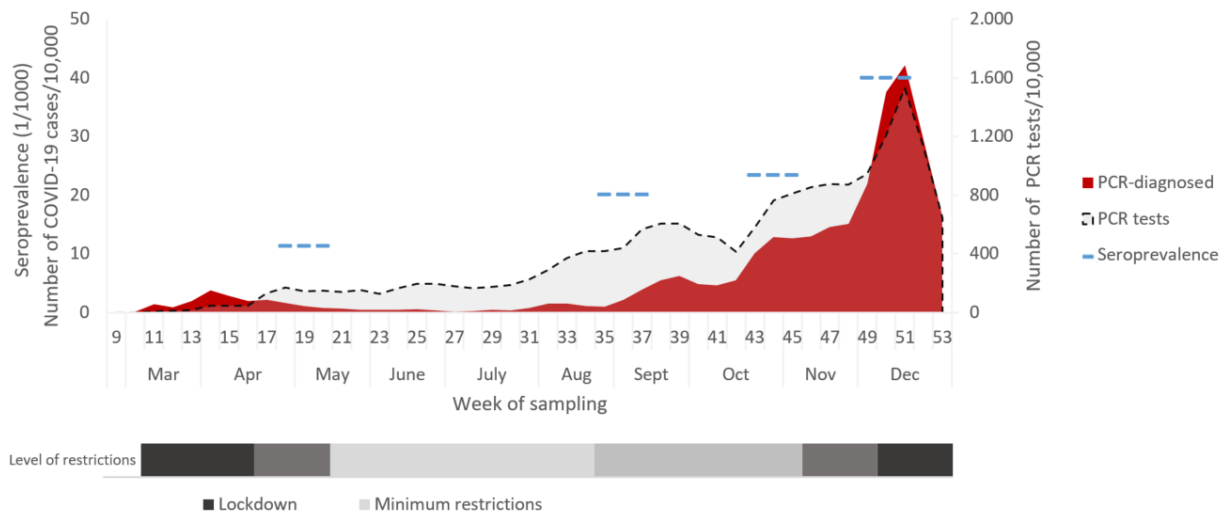

**Figure 1** Number of cases (per 10,000), PCR tests (per 10,000), seroprevalence (per 1,000) and measures to reduce transmission by week, Denmark 2020

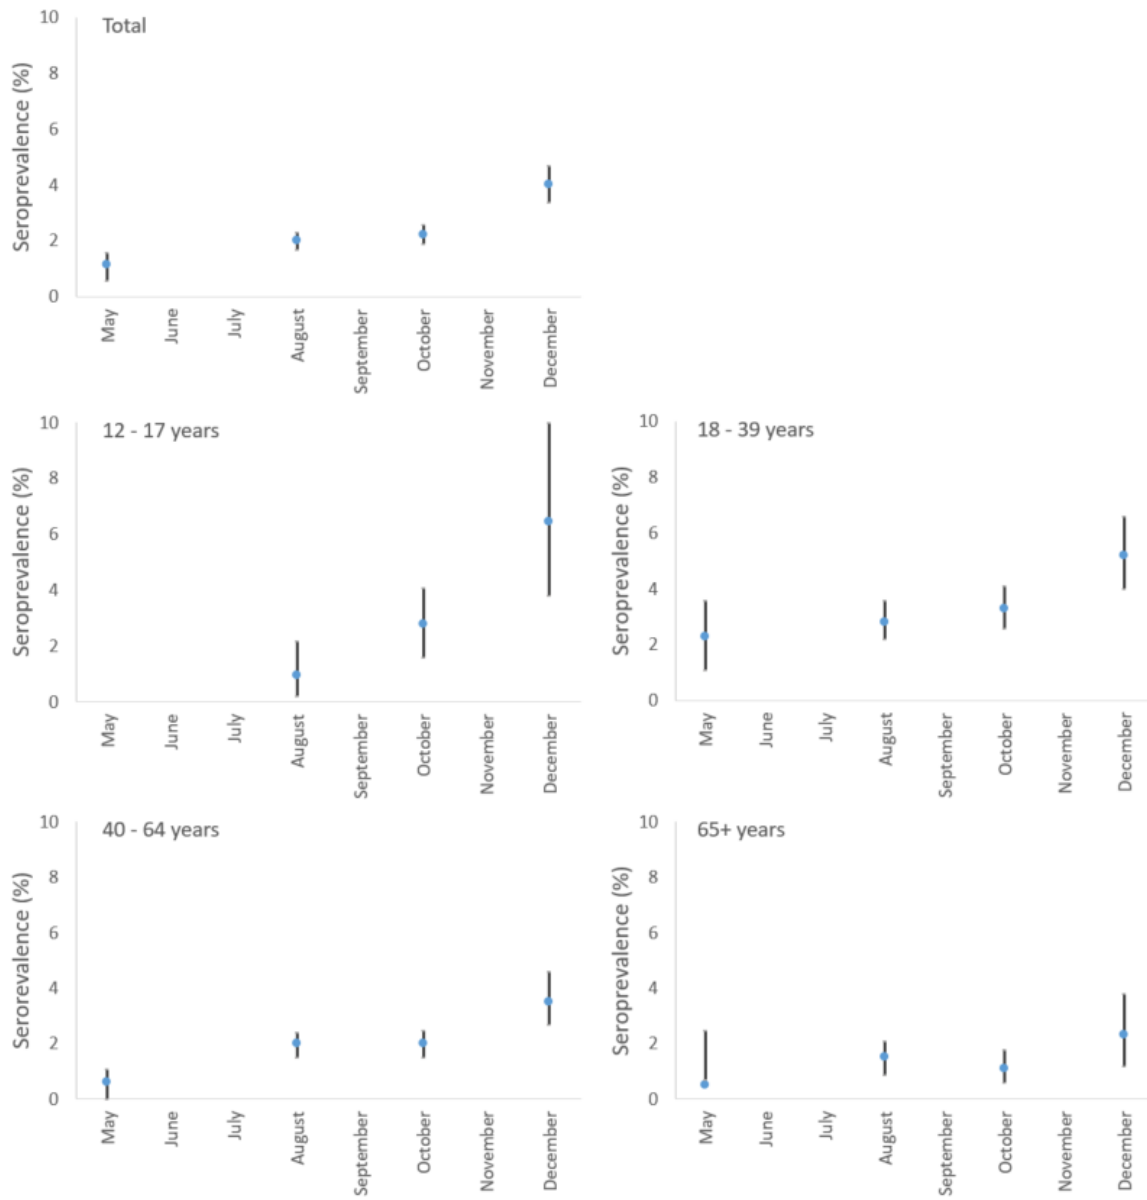

**Figure 2** Seroprevalence of SARS-CoV-2 in May, August – December 2020, by age group, Denmark
